# Supplementary material for: Photo-Electrochemical Reduction of PFAS in Complex Water Matrices
Source: Research Square preprint supplement (doi:10.21203/rs.3.rs-6840064/v1), 2025-07-08
Supplement: Supplementary file 1 [file 7afe0ee2ae25a580b020cf36.docx]

**Table of Contents**

[**Table S1**. Summary of literature information on ER and PER treatment of PFAS. 2](#_Toc200102999)

[**Table S2**. Bader charge and corresponding oxidation states for different elements 4](#_Toc200103000)

[**Table S3.** Full names, abbreviations, CAS registry numbers, method detection limit (MDL) 5](#_Toc200103001)

[**Table S4.** Cost breakdown of the Pd-TiO2 cathode in different configurations. 6](#_Toc200103002)

[**Table S5.** Composition of WWTP ROC and AFFF diluted by tap water. 6](#_Toc200103003)

[**Fig. S1**. Band structure of Pd-TiO2 heterojunction electrocatalyst under different scenarios. 7](#_Toc200103004)

[**Fig. S2.** Control tests to rule out removal mechanisms unrelated to ER and PER processes. 8](#_Toc200103005)

[**Fig. S3.** Cyclic voltammetry of the plate-type Pd–TiO₂ cathode in 100 mM Na₂SO₄ electrolyte. 10](#_Toc200103006)

[**Fig. S4**. (a) PFOS desulfonation efficiencies after eight hours for ER and PER treatment. (b) Mass balance of fluorine from PFOS before and after ER treatment. 10](#_Toc200103007)

[**Fig. S5**. Change of PFOS concentrations by ER and post-ER. . 11](#_Toc200103008)

[**Fig. S6.** Impact of Pd/Ti ratios on (a) PFOS removal and (b) defluorination.. 11](#_Toc200103009)

[**Fig. S7.** Decay of PFOS concentrations under different current densities. 12](#_Toc200103010)

[**Fig. S8.** Change of pH during the PER treatment in dual and single chamber reactors. 12](#_Toc200103011)

[**Fig. S9.** Impacts of e-aq quencher on PFOS removal and defluorination.. 13](#_Toc200103012)

[**Fig. S10.** Reduction of ClO4– and ClO3– in the catholyte by ER and PER. . 14](#_Toc200103013)

[**Fig. S11.** Impacts of dissolved oxygen (DO) on (a) PFOS removal and (b) defluorination in the absence and presence of air purging (0.1 L/min). . 14](#_Toc200103014)

[**Fig. S12.** Defluorination and chain-shortening Pathways of perfluorooctyl fragment on Pd (111) surface at pH 3 and potential -0.5 V vs. RHE.. 15](#_Toc200103015)

[**Fig. S13**. Time-dependent concentration profiles of PFOS and its detected transformation products (TPs) were monitored during the PER degradation process. . 15](#_Toc200103016)

[**Fig. S14.** (a) Decay of PFOS at different NOM concentrations (mg/L as TOC). (c) Photos NOM (100 mg/L as TOC) spiked electrolyte, containing 10 µM PFOS in 100 mM Na2SO4, before and after PER treatment, compared with photolysis treatment. 16](#_Toc200103017)

[**Fig. S15.** Decay of PFOS at different NO3- concentrations. . 16](#_Toc200103018)

[**Fig. S16.** (a) Decay of PFOS concentrations under different Ca2+ concentrations. 17](#_Toc200103019)

[**Fig. S17.** Stability test of PFOS removal by Pd-TiO2 over five consecutive PER batches (8 h per batch). 17](#_Toc200103020)

[**Fig. S18.** Treatment of PFOS using a bare Ti tube cathode in the PER mode. 18](#_Toc200103021)

[**Fig. S19.** Degradation and defluorination of PFOS in PER-EO tandem treatment process. 18](#_Toc200103022)

[**Fig. S20**. PFOS degradation as a function of specific charge (Ah/L) using tube and mesh Pd-TiO2 electrodes.. 19](#_Toc200103023)

[**Fig. S21.** Variation of Q-ToF-MS peak areas of precursors as functions of reaction time in the PER-EO treatment process. 19](#_Toc200103024)

[**Fig. S22.** Thermodynamic Hess cycle used to incorporate the free energy of deprotonation and solvation of C8F17SO3 (PFOS), allowing calculation of adsorption free energy of PFOS on surfaces. 20](#_Toc200103025)

**Table S1**. Summary of literature information on ER and PER treatment of PFAS.

|  | References | Configuration | Mechanisms | Half-life, t1/2 | Max. RE* | Max. DeF | EEO* |
| --- | --- | --- | --- | --- | --- | --- | --- |
| PER | This Study | **Cathode:** Pd-TiO2 tube in Na2SO4  **Anode:** Ir0.3Ta0.7Ox in Na2SO4  **Reactor**: single cell + 16 W UV lamp  **Targets**: PFOS | Cathodic adsorption and eaq-mediated reduction | PFOS: 1.1 h | PFOS: 100% @ pH 6 | PFOS: 41% @ pH 6 | 178 Wh/L† |
| Su et al (2019)1 | **Cathode:** CNT with cationic surfactants in NaClO4  **Anode:** Pt in NaClO4  **Reactor:** single-cell + 450 W UV lamp  **Target:** PFOS | Surfactant-mediated adsorption and eaq-mediated defluorination | NA | PFOS: not measured @ pH 8.5 | PFOS: 7.5% @ pH 8.5 | 2244 Wh/L |
| Rao et al. (2020)2 | **Cathode:** CNT with cationic surfactants in NaClO4  **Anode:** Pt in NaClO4  **Reactor:** single-cell + 450 W UV lamp  **Targets:** PFOS, PFBS, PFHxS PFHpA, PFOA, PFNA | Surfactant-mediated adsorption and eaq-mediated defluorination | NA | NA | PFOS: 20% @ pH 11  PFOA: 27% @ pH 11 | NA |
| Liu et al (2022)3** | **Cathode:** diamond in deionized water with PFOA  **Anode:** Pt in KI solution  **Reactor:** H-cell + 500 W UV lamp  **Target:** PFOA | eaq generated from diamond for defluorination | 1 h | PFOA: 100% | PFOA: 60% | NA |
| ER | Calvillo Solís et al (2024)4 | **Cathode:** Au in KHCO3  **Anode:** TiO2 in KHCO3  **Reactor:** H-cell  **Target:** PFOA | Direct electron transfer and H/F exchange | NA | NA | NA | NA |
| Ackerman Grunfeld et al5  (2024) | **Cathode:** granular activated carbon in Na2SO4  **Anode:** stainless steel in Na2SO4  **Reactor:** H-cell or single-cell  **Target:** PFMeUPA, PFOS | Not confirmed | No reaction at room temperature. | NA | NA at room temperature | NA |
| Yue Wang6 (2023) | **Cathode:** CNT with surfactants in phosphate-buffered solution (PBS)  **Anode:** Pt in PBS  **Targets:** PFMeUPA, PFOA | Adsorption via surfactant and defluorination via direct electron transfer | PFMeUPA: 5 h  PFOA: 40 h | PFMeUPA: 100%  PFOA: 60% | PFMeUPA: 80%  PFOA: no defluorination | NA |
| Jaixin Zhu7 (2022) | **Cathode:** Rh/Ni in organic solvents with PFAS  **Anode:** Pt in organic solvents  **Reactor:** dual-chamber cell  **Target:** PFOA | Direct electron transfer and H/F exchange. | PFOA: 12 h | PFOA: 50% | PFOA: 2% | NA |

* RE: Removal efficiency; EEO: electrical energy per order of removal.

** The authors express concerns about the cited study. As shown in Figure S1 of the cited article, an H-cell with a porous glass frit was used to separate the anodic and cathodic chambers. However, the study employs KI as the anolyte, which raises potential issues. KI could diffuse into the cathodic chamber and initiate homogeneous UV/I⁻ reactions, a well-known reaction to generate eaq.8 Consequently, it is unclear whether the defluorination of PFOA observed in this study is primarily due to the eaq yield from the UV/I⁻ reaction or from the diamond cathode.

† EEO of PFOS removal for the PER process using Pd-TiO2 mesh cathode is calculated as the sum of energy consumed by electrochemical oxidation (EO) and UV lamp.

The calculation is based on the results of **Fig. S20**.The parameters include current (1.5 A), average voltage (8.5 V), treatment time (6 h), volume(0.7 L), and UV lamp power (16 W). Since only half of the UV lamp was submerged in water, a coefficient of 0.5 was applied to account for the effective UV energy contribution.

**Table S2**. Bader charge and corresponding oxidation states for different elements

| Atom | Bader Charge | Oxidation State |
| --- | --- | --- |
| F | -0.6 | -1 |
| H | -0.62 to -0.65 | +1 |
| O | < -1.27 | -1 |
| -1.35 to -1.40 | -2 |
| S | +3 to +3.3 | +5 |
| Ti | +2 to +2.11 | +4 |

**Table S3.** Full names, abbreviations, CAS registry numbers, method detection limit (MDL)

| No. | Full name | Abbr. | CAS No. | RT (min)*a* | MDL (µg/L) |
| --- | --- | --- | --- | --- | --- |
| 1 | Perfluoro-n-butanoic acid | PFBA | 375-22-4 | 0.77 | 0.004 |
| 2 | Perfluoro-n-pentanoic acid | PFPeA | 2706-90-3 | 0.67 | 0.004 |
| 3 | Perfluoro-n-hexanoic acid | PFHxA | 307-24-4 | 2.07 | 0.004 |
| 4 | Perfluoro-n-heptanoic acid | PFHpA | 375-85-9 | 2.57 | 0.004 |
| 5 | Perfluoro-n-octanoic acid | PFOA | 335-67-1 | 2.78 | 0.004 |
| 6 | Perfluoro-n-nonaoic acid | PFNA | 375-95-1 | 2.96 | 0.004 |
| 7 | Perfluoro-n-decanoic acid | PFDA | 335-76-2 | 3.03 | 0.004 |
| 8 | Perfluoro-n-undecanoic acid | PFUdA | 2058-94-8 | 3.17 | 0.004 |
| 9 | Perfluoro-n-dodecanoic acid | PFDoA | 307-55-1 | 3.29 | 0.004 |
| 10 | Perflluoro-n-tridecanoic acid | PFTrDA | 72629-94-8 | 3.41 | 0.004 |
| 11 | Perflluoro-n-tetradecanoic acid | PFTeDA | 376-06-7 | 3.53 | 0.004 |
| 12 | Potassium perfluoro-1-butanesulfonate | PFBS | 375-73-5 | 1.35 | 0.004 |
| 13 | Sodium perfluoro-1-pentanesulfonate | PFPeS | 630402-22-1 | 2.4 | 0.004 |
| 14 | Sodium perfluoro-1-hexanesulfonate | PFHxS | 355-46-4 | 2.63 | 0.004 |
| 15 | Sodium-perfluoro-1-heptanesulfonamide | PFHpS | 375-92-8 | 2.78 | 0.004 |
| 16 | Sodium perfluoro-1-octanesulfonate | PFOS | 1763-23-1 | 2.91 | 0.004 |
| 17 | Sodium perfluoro-1-nonanesulfonate | PFNS | 98789-57-2 | 3.02 | 0.004 |
| 18 | Sodium-perfluoro-1-decanesulfonate | PFDS | 335-77-3 | 3.13 | 0.004 |
| 19 | Sodium 1H,1H,2H,2H-perfluorohexane sulfonate | 4:2 FTS | 757124-72-4 | 1.26 | 0.004 |
| 20 | Sodium 1H,1H,2H,2H-perfluorooctane sulfonate | 6:2 FTS | 27619-97-2 | 2.61 | 0.004 |
| 21 | Sodium 1H,1H,2H,2H-perfluorodecane sulfonate | 8:2 FTS | 39108-34-4 | 2.92 | 0.004 |
| 22 | Sodium 1H,1H,2H,2H-perfluorododecane sulfonate* | 10:2 FTS | N/A | 3.18 | 0.004 |
| 23 | Perfluoro-1-octanesulfonamide | FOSA-1 | 754-91-6 | 3.87 | 0.004 |
| 24 | Perfluoro-1-octanesulfonamidoacetic acid* | FOSAA | 2806-24-8 | 3.2 | 0.004 |
| 25 | N-methylperfluoro-1-octanesulfonamidoacetic acid | N-MeFOSAA | 2355-31-9 | 3.43 | 0.004 |
| 26 | N-methylperfluoro-1-octanesulfonamide* | N-MeFOSA-M | 31506-32-8 | 4.36 | 0.004 |
| 27 | N-ethylperfluoro-1-octanesulfonamidoacetic acid | N-EtFOSAA | 2991-50-6 | 3.48 | 0.004 |
| 28 | N-ethylperfluoro-1-octanesulfonamide* | N-EtFOSA-M | 4151-50-2 | 4.45 | 0.004 |
| 29 | Trifluoroacetate | TFA | 2923-18-4 | 0.46 | 0.004 |
| 30 | Perfluoropropanoic acid | PFPA | 422-64-0 | 0.48 | 0.004 |

**Table S4.** Cost breakdown of the Pd-TiO2 cathode in different configurations.

| **Electrode type** | **Ti Substrate ($/m²)a** | **Pd-TiO2 Coating ($/m²)b** | **Total Cathode Cost ($/m²)** |
| --- | --- | --- | --- |
| **Plate** | 185 | 134 | 319 |
| **Tube** | 826 | 132 | 958 |
| **Mesh** | 65 | 122 | 187 |

a The costs of the Ti plate (Grade 2 Titanium Sheet, 0.02" × 12" × 12"), Ti tube (Grade 9 Titanium tube; Ø 0.55"), and Ti mesh (Grade 2 100 mesh opening) were normalized by the double-sided projected surface area. The double-sided surface areas for Ti plate and tube are 16 and 48 cm2.For the Ti mesh, the surface area was calculated as twice the projected area, resulting in 256 cm².

b The preparation of 50 mL Pd/TiO2 sol-gel precursor at a Pd/Ti molar ratio of 0.2 requires citric acid (11.5 g; $0.076/g), PdCl2 (0.035 g; $88/g), ethylene glycol (25 mL; $0.081/mL), titanium butoxide (0.34 mL; $0.24/mL), and ethanol (5 mL; $0.12/mL). The total cost of the precursor is $0.13/mL. The coating process consumed 1.7 mL, 4.8 mL, and 24 mL of the solution for the Ti plate (16 cm2), Ti tube (48 cm2), and Ti mesh (256 cm2), respectively. The cost of Pd-coating is calculated using the formula:

Cost of coating ($/m2) = [Cost of precursor ($/mL)] × [Consumed precursor volume (mL)]/[Double-sided surface area (m2)]

For reference, the commercial Ir0.3Ta0.7Ox anode used in this study is priced at approximately $600/m2.

**Table S5.** Composition of WWTP ROC and AFFF diluted by tap water.

|  | WWTP ROC | | Tap water w/ AFFF* | | |
| --- | --- | --- | --- | --- | --- |
| Before Treatment | After PER | Before Treatment | After PER | After EO |
| Conductivity (mS/cm) | 8.1 | 8.0 | 0.27 | 0.31 | 2.5 |
| pH | 8.4 | 9.3 | 6.2 | 6.8 | 6.5 |
| TOC (mg/L) | 50.4 | 24.6 | 38.8 | 17.5 | 0.4 |
| Cl- (mg/L) | 1950 | 2044 | 1.8 | 2 | N.D. |
| NO3- (mg/L) | 37 | 13 | 7.4 | N.D. | N.D. |
| SO42- (mg/L) | 1312 | 1330 | 44 | 52 | 8750 |
| ClO3- (mg/L) | 3 | N.D. | N.D. | N.D. | N.D. |
| ClO4- (mg/L) | N.D. | N.D. | N.D. | N.D. | 3.2 |
| F- (mg/L) | 1.9 | 2.6 | 0 | 0.47 | 2.05 |

* AFFF (Platinum Plus C6 3% AFFF Buckeye MIL-SPEC) was diluted 5000 times by tap water to simulate firefighting equipment cleaning solution.9

**Fig. S1**. Band structure of Pd-TiO2 heterojunction electrocatalyst under different scenarios. (a) The original band structures of TiO2 and Pd before forming the heterojunction. (b) Pd-TiO2 electrocatalyst at open circuit and under UV 254 nm irradiation. (c) Pd-TiO2 electrocatalyst at -0.5 VNHE and under UV 254 nm irradiation. Evac, Ev,and Ec represent the vacuum energy level, conduction band edge, and valence band edge; Ef is the Fermi level; Φ is the work function; e-hot_TiO2 and e-hot_Pd refer to hot electrons generated from UV-excited TiO2 and Pd, respectively.

**Extended Discussion of Fig. S1.**

The Ec and Ev of anatase TiO2 were obtained from literature values.10 The Ef of TiO2 (Ef_TiO2) is close Ec, owing to the n-type semiconductor nature of TiO2.11 The Ef of Pd (Ef_Pd) was calculated to be 0.66 VNHE based on its ΦPd of 5.1 eV relative to Evac.12 The band structures are illustrated in both electron energy and potential scales in **Fig. S1a**.

The Pd-TiO2 catalysts developed in this study form heterojunctions. Upon contact between Pd and TiO₂, a Schottky barrier is formed, leading to downward band bending in TiO2.13 As a result, the Ef_TiO2 aligns with Ef_Pd at 0.66 VNHE. In an aqueous electrochemical system, the Ef values of electrocatalysts correspond to electrochemical potentials.11 We experimentally measured the open-circuit potential of the Pd-TiO2 cathode in a 100 mM Na₂SO4 electrolyte, obtaining a value of 0.60 VNHE, which is in good agreement with the calculated Ef_Pd of 0.66 VNHE, as shown in **Fig. S1b**.

Under 254 nm UV irradiation (photon energy = 4.88 eV), photoexcitation can promote electrons from the TiO2 valence band to generate hot electrons (e-hot_TiO2). As shown in **Fig. S1b,** the maximum reduction potential of e-hot_TiO2 can be estimated by subtracting the photon energy from the Ev (3.28 VNHE), yielding a potential of approximately -1.6 VNHE. In addition, 4d-band electrons in Pd can also be excited by UV light via interband transitions,14 resulting in the generation of e-hot_Pd. The reduction potential of these e-hotcan be estimated by subtracting UV254 photon energy from the Ef_Pd,14 leading to a maximum potential of -4.22 VNHE.

In addition to UV254 nm irradiation, applying a cathodic potential of -0.5 VNHE on the Pd-TiO2 catalyst (i.e., the condition of PER treatment of PFAS in the main text) shifts Ef of TiO2 and Pd upward to -0.5 VNHE (**Fig. S1c**). Correspondingly, the reduction potentials of e-H are also shifted to more negative values. Notably, the reduction potential of e-hot is -4.72 VNHE, which significantly exceeds the -2 VNHE threshold required for the reductive defluorination of PFOS.15

It is important to note that the reduction potentials of e-hot estimated above correspond to electrons excited into higher-energy states within the conduction band. These excited electrons remain within the solid state and will rapidly relax to energy levels near Ec_TiO2 or Ef_Pd within femtoseconds to picoseconds.16,17 Under UV irradiation alone, the e-hot_TiO2 clearly lacks sufficient reducing power for PFOS defluorination. While e-hot_Pd initially possesses a highly negative reduction potential, it rapidly loses energy before it can effectively react with PFOS in the aqueous phase. Consequently, UV irradiation on the Pd-TiO2 electrode at open-circuit does not result in PFOS degradation in our experimental observation (**Fig. S2b**). Without UV irradiation, applying only a cathodic potential of -0.5 VNHE (i.e., shifting Ef to -0.5 VNHE without generating e-hot) is also insufficient to meet the thermodynamic threshold of -2 VNHE required for PFOS defluorination. This observation is consistent with the experimental result showing no PFOS degradation under ER mode (**Fig. 2b** in the main text).

However, under simultaneous UV irradiation and application of a cathodic potential (PER mode), several synergistic effects are involved. Specifically, cathodic adsorption of PFOS and C–S bond cleavage on TiO₂, along with the transfer of perfluoroalkyl groups to Pd, facilitate intimate contact between the perfluoroalkyl group and highly reducing e-hot_Pd. These combined factors enable reductive PFOS removal and defluorination.

Moreover, since the energy of e-hot_Pd exceeds the Evac, it is sufficiently high to allow electron emission from the solid phase into the aqueous phase, generating hydrated electrons (e-aq) at the electrode-solution interface to react with adsorbed PFOS and Pd immobilized perfluoroalkyl group.18 Therefore, e-hot and eaq- may jointly contribute as active reductive species responsible for PFOS defluorination.

The photogenerated holes (h+) on UV-excited TiO₂ and Pd are likely rapidly neutralized by electrons supplied through the cathodic current and therefore, do not contribute significantly to PFAS degradation.

**Fig. S2.** Control tests to rule out removal mechanisms unrelated to ER and PER processes. Change of PFOS concentration (a) under open circuit potential, (b) by UV photolysis, and (c) under H2 with and without UV light irradiation. Data with error bars are presented as the mean values of triplicate samples ± standard deviation.

**Fig. S3.** Cyclic voltammetry of the plate-type Pd–TiO₂ cathode in 100 mM Na₂SO₄ electrolyte. Ir0.3Ta0,7Ox was used as an anode and a Ag/AgCl (3 M KCl) electrode was used as the reference. The applied cathodic potential (Eₐ) was corrected for iR drop using the uncompensated resistance (Rᵤ = 1.2 Ω), determined by electrochemical impedance spectroscopy at 100 kHz with a 20 mV sine wave. The potential was further converted to the reversible hydrogen electrode (RHE) scale.

**Fig. S4**. (a) PFOS desulfonation efficiencies after eight hours for ER and PER treatment. (b) Mass balance of fluorine from PFOS before and after ER treatment. The blue, pink, and orange colors of the stacked plots represent the PFOS residual in the solution, adsorbed on the cathode and desulfonated parts of PFOS separately, and the rest (grey) represent the unknowing loss in PFOS. Reaction conditions: 10 µM PFOS were spiked in 100 mL NaClO4 (10 mM) catholyte. A current density of 15 mA/cm2 was applied to a 16 cm2 Pd-TiO₂ cathode in a dual-chamber reactor. An Ir0.3Ta0.7Ox anode (16 cm2) served as the counter electrode, with 100 mL of 100 mM H2SO4 used as the anolyte. Data are presented as the mean values of triplicates ± standard deviation.

**Fig. S5**. Change of PFOS concentrations by ER and post-ER. After 8 h of ER treatment, the current was stopped. Reaction conditions: PFOS (10 µM) was spiked into 100 mL of 100 mM Na2SO4 catholyte. A current density of 15 mA/cm2 was applied to a 16 cm2 Pd-TiO₂ cathode in a dual-chamber reactor. An Ir0.3Ta0.7Ox anode (16 cm2) served as the counter electrode, with 100 mL of 100 mM H2SO4 used as the anolyte. All data are presented as the mean values of triplicate tests ± standard deviation.

**Fig. S6.** Impact of Pd/Ti ratios on (a) PFOS removal and (b) defluorination. Reaction conditions: PFOS (10 µM) was spiked into 100 mL of 100 mM Na2SO4 catholyte. A current density of 15 mA/cm2 was applied to a 16 cm2 cathode with different Pd/Ti ratios in a dual-chamber reactor. An Ir0.3Ta0.7Ox anode (16 cm2) served as the counter electrode, with 100 mL of 100 mM H2SO4 used as the anolyte. All data are presented as the mean values of triplicate tests ± standard deviation.

**Fig. S7.** Decay of PFOS concentrations under different current densities. Reaction conditions: PFOS (10 µM) was spiked into 100 mL of 100 mM Na2SO4 catholyte. Different current densities were applied to a 16 cm2 Pd-TiO₂ cathode in a dual-chamber reactor. An Ir0.3Ta0.7Ox anode (16 cm2) served as the counter electrode, with 100 mL of 100 mM H2SO4 used as the anolyte. All data are presented as the mean values of triplicate tests ± standard deviation.

**Fig. S8.** Change of pH during the PER treatment in dual and single chamber reactors.

**Fig. S9.** Impacts of e-aq quencher on PFOS removal and defluorination. Impacts of (a+b) Na2SeO4 and (c+d) Cd(ClO4)2 on the PER removal and defluorination of PFOS. Reaction conditions: The PER treatment was conducted in a dual-chamber reactor. 10 μM PFOS were spiked in 100 mL Na2SO4 (100 mM) catholyte amended with either Na2SeO4 or Cd(ClO4)2. A current density of 15 mA/cm2 was applied to a 16 cm2 Pd-TiO2 cathode. An Ir0.3Ta0.7Ox anode (16 cm2) served as the counter electrode, with 100 mL of 100 mM H2SO4 used as the anolyte. All data are presented as the mean values of triplicate tests ± standard deviation.

**Fig. S10.** Reduction of ClO4– and ClO3– in the catholyte by ER and PER. Reaction conditions: 1 mM ClO4– or ClO3– were spiked in 100 mL Na2SO4 (100 mM) catholyte. A current density of 15 mA/cm2 was applied to a 16 cm2 Pd-TiO₂ cathode in a dual-chamber reactor. An Ir0.3Ta0.7Ox anode (16 cm2) served as the counter electrode, with 100 mL of 100 mM H2SO4 used as the anolyte. The applied total current was 0.24 A. All data are presented as the mean values of triplicate tests ± standard deviation.

**Fig. S11.** Impacts of dissolved oxygen (DO) on (a) PFOS removal and (b) defluorination in the absence and presence of air purging (0.1 L/min). The DO levels were monitored throughout the reaction using an IDS ProODO® probe (YSI). Reaction conditions: PFOS (10 µM) was spiked into 100 mL of 100 mM Na2SO4 catholyte. A current density of 15 mA/cm2 was applied to a 16 cm2 Pd-TiO₂ cathode in a dual-chamber reactor. An Ir0.3Ta0.7Ox anode (16 cm2) served as the counter electrode, with 100 mL of 100 mM H2SO4 used as the anolyte. All data are presented as the mean values of triplicate tests ± standard deviation.


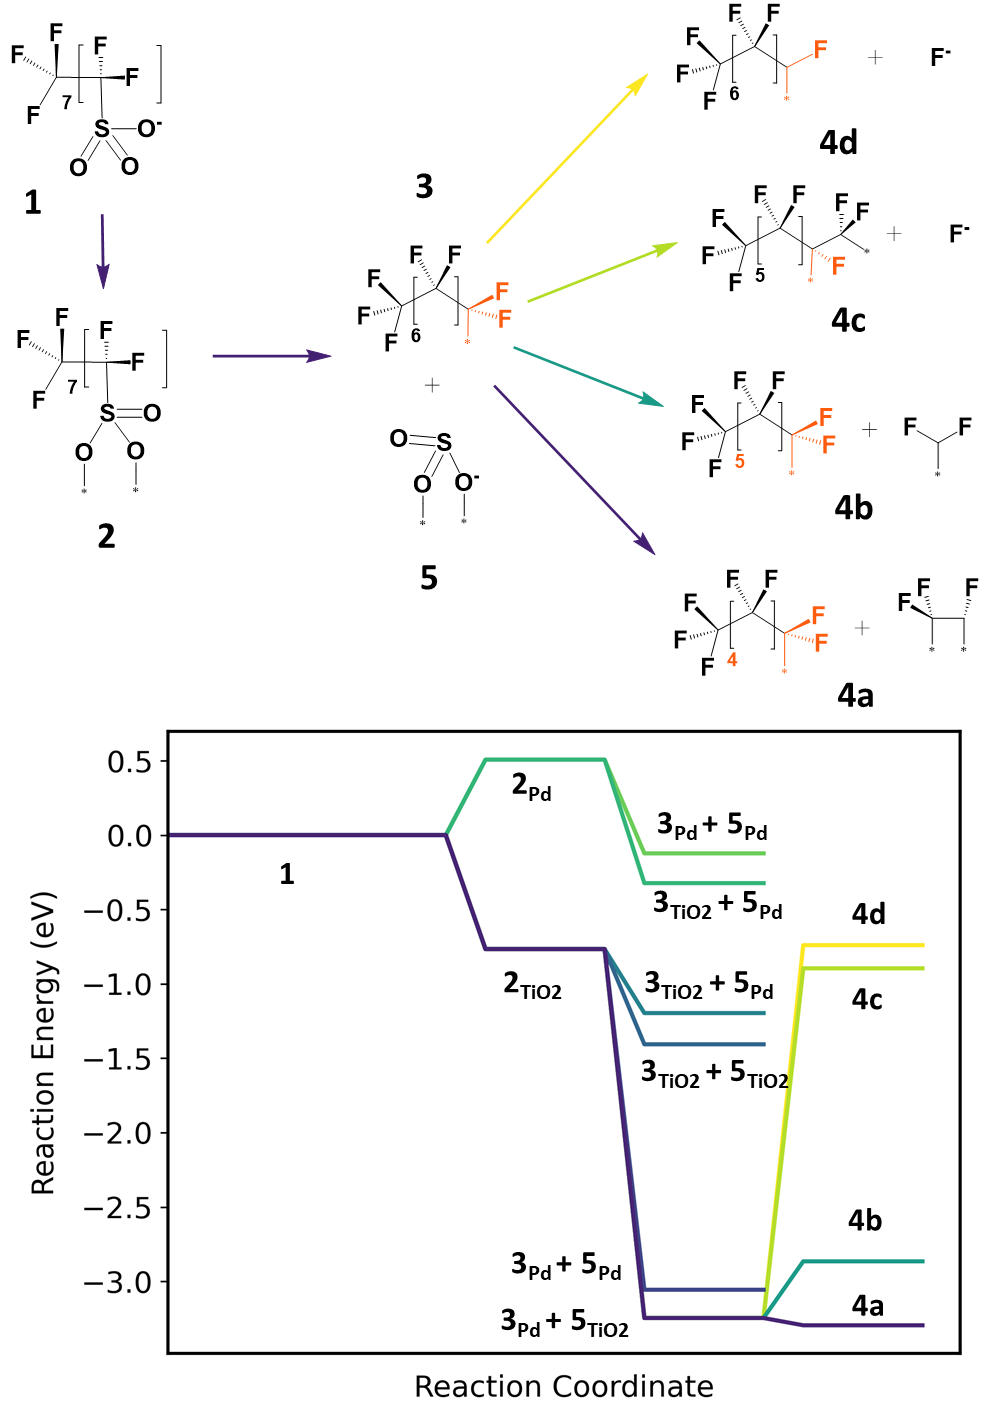


**Fig. S12.** Defluorination and chain-shortening Pathways of perfluorooctyl fragment on Pd (111) surface at pH 3 and potential -0.5 V vs. RHE. The asterisks indicate the surface (Pd or TiO₂) to which the adsorbate atom is bonded.

**Fig. S13**. Time-dependent concentration profiles of PFOS and its detected transformation products (TPs) were monitored during the PER degradation process. TP1 concentrations were measured using HPLC/QToF-MS and estimated assuming the same mass spectrometric response factor as PFOS. TP2 (PFOA) was quantified by UPLC-MS/MS.

**Fig. S14.** (a) Decay of PFOS at different NOM concentrations (mg/L as TOC). (c) Photos NOM (100 mg/L as TOC) spiked electrolyte, containing 10 µM PFOS in 100 mM Na2SO4, before and after PER treatment, compared with photolysis treatment. For PER tests, a 15 mA/cm2 current density was applied to a 16 cm2 Pd-TiO2 plate-type cathode. The PER treatment was conducted in a dual-chamber reactor at a current of 0.24 A. Direct photolysis treatment was performed by irradiating the catholyte with a 16-W UV lamp for eight hours in the absence of the cathode and without applying any current. Data are presented as the mean values of triplicate tests ± standard deviation.

**Fig. S15.** Decay of PFOS at different NO3- concentrations. Reaction conditions: PFOS (10 µM) was spiked into 100 mL of 100 mM Na2SO4 catholyte. A current density of 15 mA/cm2 was applied to a 16 cm2 Pd-TiO₂ cathode in a dual-chamber reactor. An Ir0.3Ta0.7Ox anode (16 cm2) served as the counter electrode, with 100 mL of 100 mM H2SO4 used as the anolyte. All data are presented as the mean values of triplicate tests ± standard deviation.

**Fig. S16.** (a) Decay of PFOS concentrations under different Ca2+ concentrations. (b) Changes in anionic concentration over time. Reaction conditions: PFOS (10 µM) was spiked into 100 mL of 100 mM Na2SO4 catholyte. A current density of 15 mA/cm2 was applied to a 16 cm2 Pd-TiO₂ cathode in a dual-chamber reactor. An Ir0.3Ta0.7Ox anode (16 cm2) served as the counter electrode, with 100 mL of 100 mM H2SO4 used as the anolyte. All data are presented as the mean values of triplicate tests ± standard deviation.

**Fig. S17.** Stability test of PFOS removal by Pd-TiO2 over five consecutive PER batches (8 h per batch). Reaction conditions: PFOS (10 µM) was spiked into 100 mL of 100 mM Na2SO4 catholyte. A current density of 15 mA/cm2 was applied to a 16 cm2 Pd-TiO₂ cathode in a dual-chamber reactor. An Ir0.3Ta0.7Ox anode (16 cm2) served as the counter electrode, with 100 mL of 100 mM H2SO4 used as the anolyte. All data are presented as the mean values of triplicate tests ± standard deviation.

**
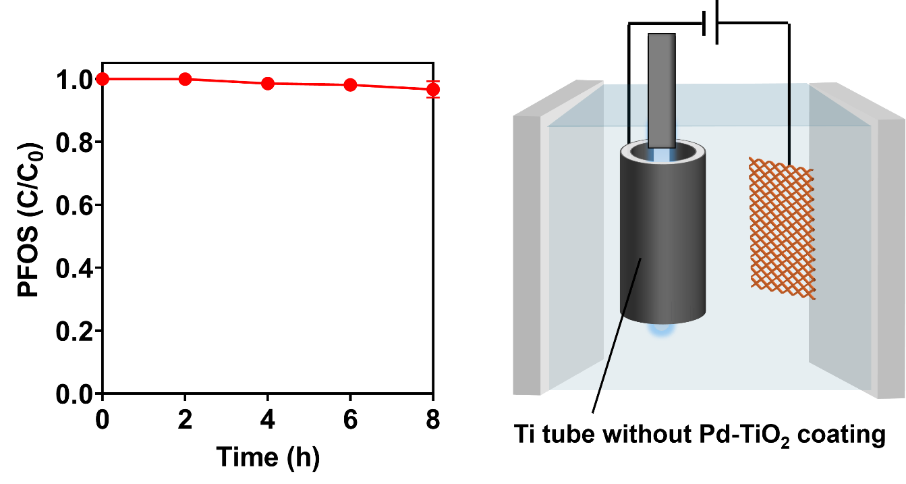
**

**Fig. S18.** Treatment of PFOS using a bare Ti tube cathode in the PER mode. Reaction conditions: 10 µM PFOS were spiked in 100 mL Na2SO4 (100 mM) electrolyte. A 15 mA/cm2 current density was applied to a 48 cm2 bare Ti tube paired with an Ir0.3Ta0.7Ox anode (16 cm2). The PER treatment was conducted in a single-chamber cell with a current of 0.72 A, and an average cell voltage of 6.5 V. Data are presented as the mean values of triplicates ± standard deviation.

**Fig. S19.** Degradation and defluorination of PFOS in PER-EO tandem treatment process. Reaction conditions: 10 µM PFOS were spiked in 100 mL Na2SO4 (100 mM) electrolyte. For the PER tests, a 15 mA/cm2 current density was applied to a 48 cm2 Pd-TiO2 tube electrode. The PER treatment using a tube cathode was conducted in a beaker at a current of 0.72 A and an average cell voltage of 6.5 V. For the EO post-treatment of the 100 mL PER treated electrolyte, a current density of 15 mA/cm2 was applied to a 16 cm2 plate type BDD anode (Element Six) paired with a stainless steel cathode. Data are presented as the mean values of triplicates ± standard deviation. DeF reached 38.5% after PER treatment and 99.6% after EO treatment.

**Fig. S20**. PFOS degradation as a function of specific charge (Ah/L) using tube and mesh Pd-TiO2 electrodes. Reaction conditions: 10 µM PFOS were spiked in 100 mL Na2SO4 (100 mM) electrolyte for the tube electrode (48 cm2) and in 700 mL Na₂SO₄ (100 mM) electrolyte for the mesh electrode (256 cm2). The PER treatment using a tube cathode was conducted in a single-chamber reactor at a current of 0.72 A and an average cell voltage of 6.5 V. The PER treatment using a mesh cathode was conducted in a single-chamber reactor at a current of 1.5 A and an average cell voltage of 8.5 V. The specific charge was calculated based on the applied current, reaction time, and the volume of the electrolyte. Data are presented as the mean values of triplicate tests ± standard deviation.

**Fig. S21.** Variation of Q-ToF-MS peak areas of precursors as functions of reaction time in the PER-EO treatment process. The structures of precursors are shown on the side.


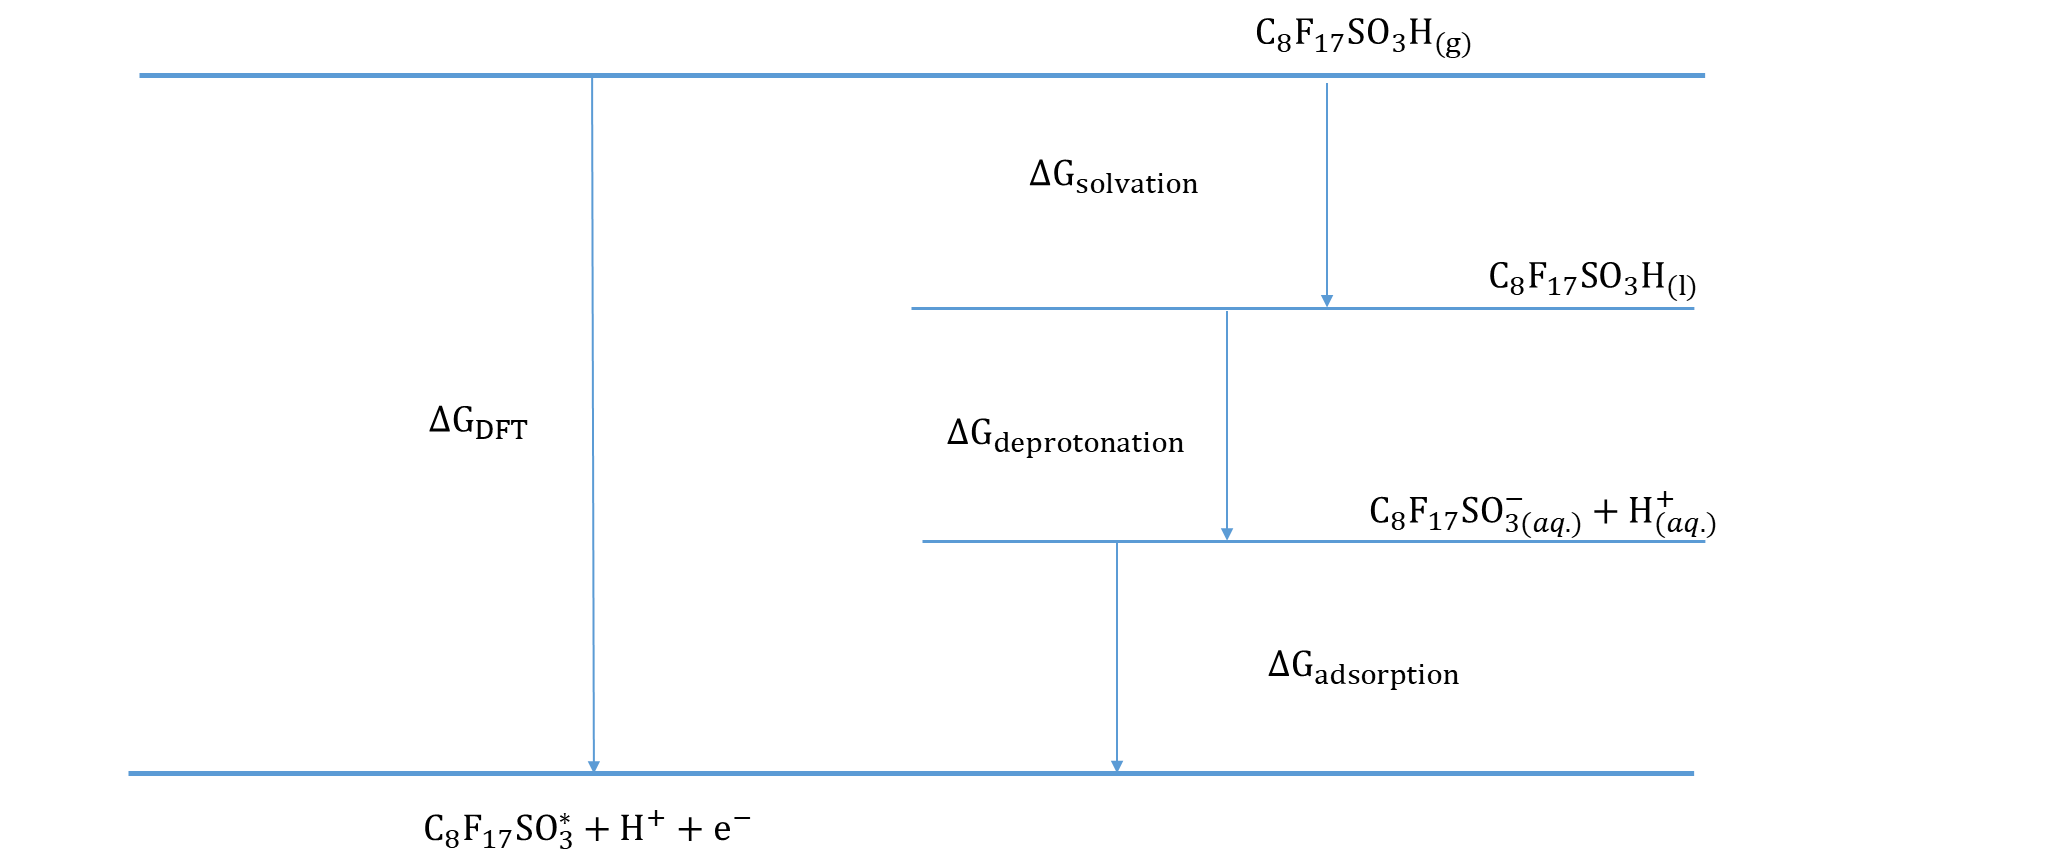


**Fig. S22.** Thermodynamic Hess cycle used to incorporate the free energy of deprotonation and solvation of C8F17SO3 (PFOS), allowing calculation of adsorption free energy of PFOS on surfaces.

**References**

(1) Su, Y.; Rao, U.; Khor, C. M.; Jensen, M. G.; Teesch, L. M.; Wong, B. M.; Cwiertny, D. M.; Jassby, D. Potential-Driven Electron Transfer Lowers the Dissociation Energy of the C–F Bond and Facilitates Reductive Defluorination of Perfluorooctane Sulfonate (PFOS). *ACS Appl. Mater. Interfaces* **2019**, *11* (37), 33913–33922. https://doi.org/10.1021/acsami.9b10449.

(2) Rao, U.; Su, Y.; Khor, C. M.; Jung, B.; Ma, S.; Cwiertny, D. M.; Wong, B. M.; Jassby, D. Structural Dependence of Reductive Defluorination of Linear PFAS Compounds in a UV/Electrochemical System. *Environ. Sci. Technol.* **2020**, *54* (17), 10668–10677. https://doi.org/10.1021/acs.est.0c02773.

(3) Liu, G.; Feng, C.; Shao, P. Degradation of Perfluorooctanoic Acid with Hydrated Electron by a Heterogeneous Catalytic System. *Environ. Sci. Technol.* **2022**, *56* (10), 6223–6231. https://doi.org/10.1021/acs.est.1c06793.

(4) Calvillo Solís, J. J.; Sandoval-Pauker, C.; Bai, D.; Yin, S.; Senftle, T. P.; Villagrán, D. Electrochemical Reduction of Perfluorooctanoic Acid (PFOA): An Experimental and Theoretical Approach. *J. Am. Chem. Soc.* **2024**, *146* (15), 10687–10698. https://doi.org/10.1021/jacs.4c00443.

(5) Grunfeld, D. A.; M. Jones, A.; Sun, J.; Thao Le, S.; Pickford, R.; Huang, Q.; Manefield, M.; Kumar, N.; J. Lee, M.; M. O’Carroll, D. Electrochemical Degradation of a C6-Perfluoroalkyl Substance (PFAS) Using a Simple Activated Carbon Cathode. *Environ. Sci. Water Res. Technol.* **2024**, *10* (1), 272–287. https://doi.org/10.1039/D3EW00543G.

(6) Wang, Y.; Xiao, Y.; Wang, Y.; Lin, Q.; Zhu, Y.; Ni, Z.; Qiu, R. Electroreductive Defluorination of Unsaturated PFAS by a Quaternary Ammonium Surfactant-Modified Cathode via Direct Cathodic Reduction. *Environ. Sci. Technol.* **2023**, *57* (19), 7578–7589. https://doi.org/10.1021/acs.est.2c08182.

(7) Zhu, J.; Chen, Y.; Gu, Y.; Ma, H.; Hu, M.; Gao, X.; Liu, T. Feasibility Study on the Electrochemical Reductive Decomposition of PFOA by a Rh/Ni Cathode. *J. Hazard. Mater.* **2022**, *422*, 126953. https://doi.org/10.1016/j.jhazmat.2021.126953.

(8) Liu, Z.; Chen, Z.; Gao, J.; Yu, Y.; Men, Y.; Gu, C.; Liu, J. Accelerated Degradation of Perfluorosulfonates and Perfluorocarboxylates by UV/Sulfite + Iodide: Reaction Mechanisms and System Efficiencies. *Environ. Sci. Technol.* **2022**, *56* (6), 3699–3709. https://doi.org/10.1021/acs.est.1c07608.

(9) Guan, Y.; Liu, Z.; Yang, N.; Yang, S.; Quispe-Cardenas, L. E.; Liu, J.; Yang, Y. Near-Complete Destruction of PFAS in Aqueous Film-Forming Foam by Integrated Photo-Electrochemical Processes. *Nat. Water* **2024**, *2* (5), 443–452. https://doi.org/10.1038/s44221-024-00232-7.

(10) Xu, Y.; Schoonen, M. A. A. The Absolute Energy Positions of Conduction and Valence Bands of Selected Semiconducting Minerals. *Am. Mineral.* **2000**, *85* (3–4), 543–556. https://doi.org/10.2138/am-2000-0416.

(11) Neamen, D. A.; Biswas, D. *Semiconductor Physics and Devices*, 2nd ed.; The McGraw-Hill Companies, Inc., 1997.

(12) Michaelson, H. B. The Work Function of the Elements and Its Periodicity. *J. Appl. Phys.* **1977**, *48* (11), 4729–4733. https://doi.org/10.1063/1.323539.

(13) Zhang, Z.; Yates, J. T. Band Bending in Semiconductors: Chemical and Physical Consequences at Surfaces and Interfaces. *Chem. Rev.* **2012**, *112* (10), 5520–5551. https://doi.org/10.1021/cr3000626.

(14) Lyu, P.; Espinoza, R.; Khan, M. I.; Spaller, W. C.; Ghosh, S.; Nguyen, S. C. Mechanistic Insight into Deep Holes from Interband Transitions in Palladium Nanoparticle Photocatalysts. *iScience* **2022**, *25* (2). https://doi.org/10.1016/j.isci.2022.103737.

(15) King, J. F.; Chaplin, B. P. Electrochemical Reduction of Per- and Polyfluorinated Alkyl Substances (PFAS): Is It Possible? Applying Experimental and Quantum Mechanical Insights from the Reductive Defluorination Literature. *Curr. Opin. Chem. Eng.* **2024**, *44*, 101014. https://doi.org/10.1016/j.coche.2024.101014.

(16) Hartland, G. V. Optical Studies of Dynamics in Noble Metal Nanostructures. *Chem. Rev.* **2011**, *111* (6), 3858–3887. https://doi.org/10.1021/cr1002547.

(17) Baldini, E.; Palmieri, T.; Pomarico, E.; Auböck, G.; Chergui, M. Clocking the Ultrafast Electron Cooling in Anatase Titanium Dioxide Nanoparticles. *ACS Photonics* **2018**, *5* (4), 1241–1249. https://doi.org/10.1021/acsphotonics.7b00945.

(18) Zhu, D.; Zhang, L.; Ruther, R. E.; Hamers, R. J. Photo-Illuminated Diamond as a Solid-State Source of Solvated Electrons in Water for Nitrogen Reduction. *Nat. Mater.* **2013**, *12* (9), 836–841. https://doi.org/10.1038/nmat3696.
